# Supplementary material
Source: ML conference proceedings conference paper supplement (https://openreview.net/forum?id=7L8jPt3y1D)



# Bongard-Tool: Tool Concept Induction from Few-Shot Visual Exemplars

## Team UnCoReable

Guangyuan Jiang\* Chuyue Tang\* Yuyang Li† Yu Liu†

\* Yuanpei Collage, Peking University

† Department of Automation, Tsinghua University

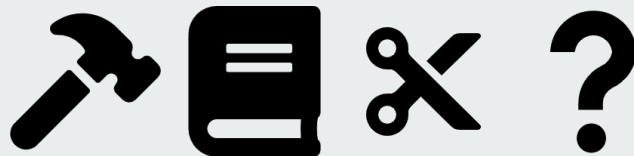

The water that bears the boat  
is the same that swallows it up.

---

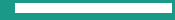

# Motivation

What makes a physical object *tool*?

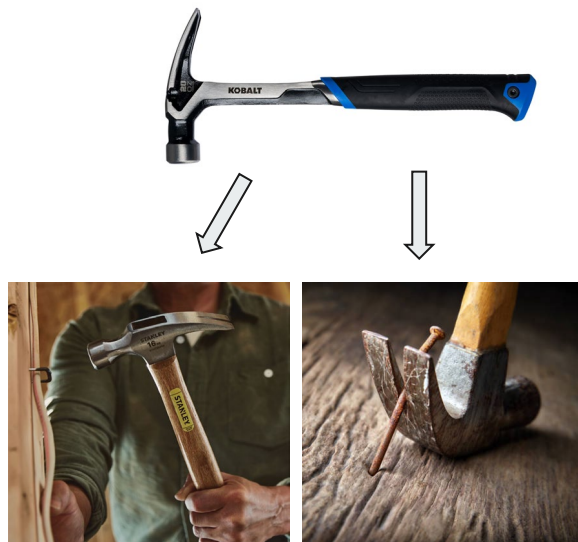

## What makes a physical object *tool*?

- **Multiple objects** can support the **same** tool use.
- **Compositional** nature of tools makes it hard to **understand** an object's tool-like functionalities **without context**.
- What can a book be?
  - A hammer for smashing
  - A lid covering instant noodles
  - Fuel when making fire
  - A pad for balancing an uneven table.

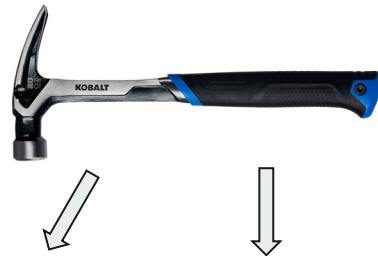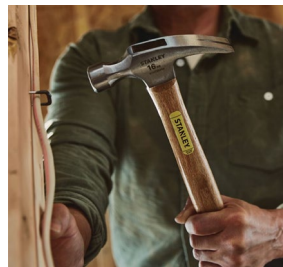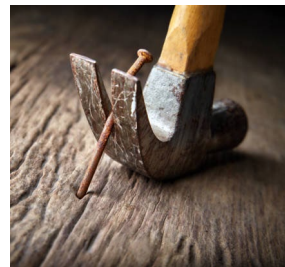



## Context of Tools Matter

- A tool is a **composition** of **multiple functions**, and the **context determines** which one comes into action.
- To address this unique property, we introduce the **Bongard-Tool** benchmark for understanding the compositional concepts of tool use.

---

# Related Work

# Tool Understanding

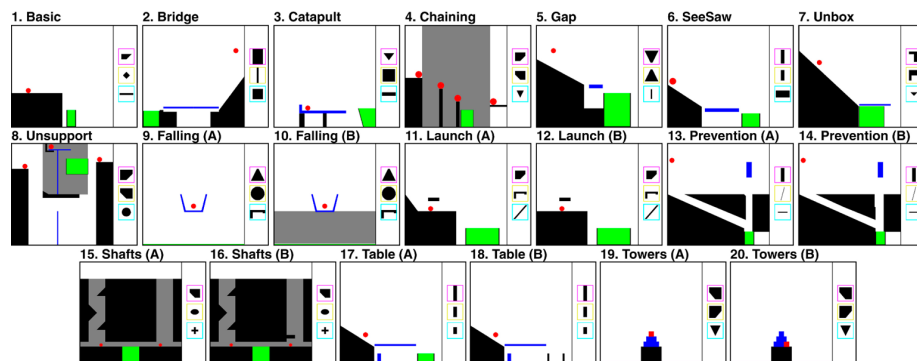

|                       | Group 1: canonical tools | Group 2: household objects | Group 3: stones |
|-----------------------|--------------------------|----------------------------|-----------------|
| tool candidates       |                          |                            |                 |
| Task 1<br>chop wood   |                          |                            |                 |
| Task 2<br>shovel dirt |                          |                            |                 |
| Task 3<br>paint wall  |                          |                            |                 |



# Few-Shot Learning Methods

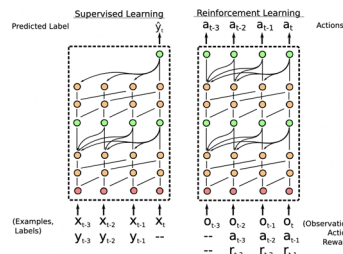

SNAIL (Mishra, 2017)

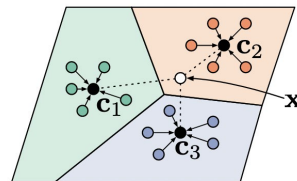

ProtoNet (Snell, 2017)

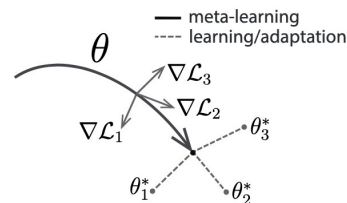

MAML (Finn, 2017)

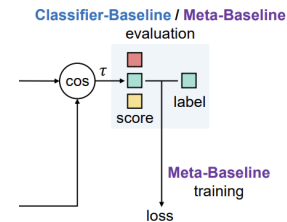

Meta-Baseline (Chen, 2020)



## The Bongard Problem (Bongard, 1970)

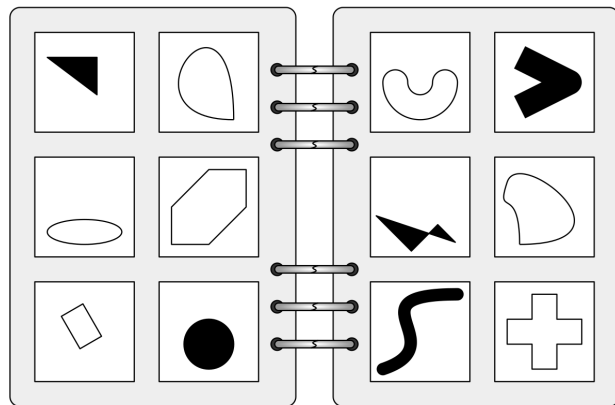

Share some *property*  
E.g. shape, color, algorithmic  
rules, ...

No such *property*

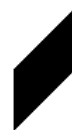

Having this *property* ?

Bongard-LOGO (Nie *et al.*, 2020)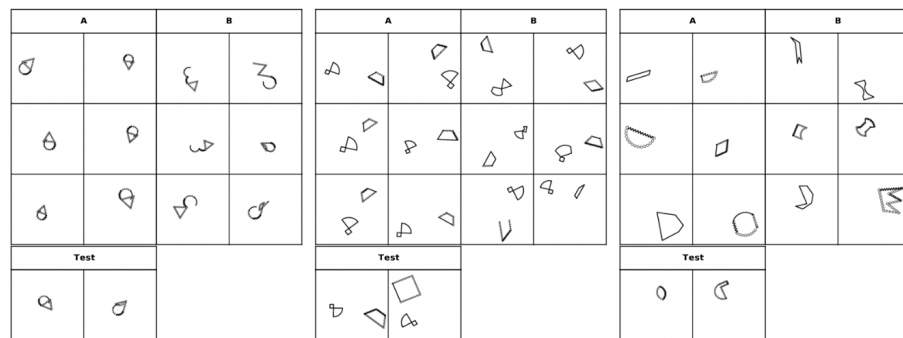

(a) free-form shape problem

(b) basic shape problem

(c) abstract shape problem

Bongard-HOI (Jiang *et al.*, 2022)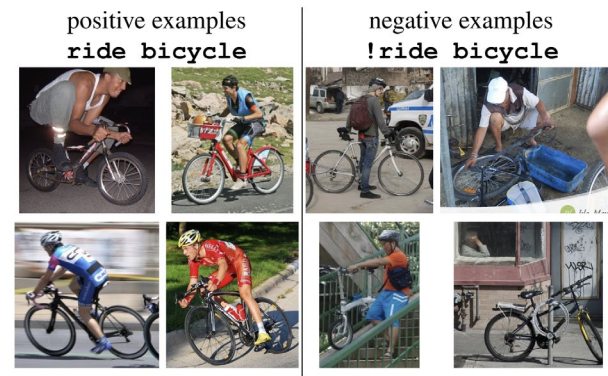

Query images:

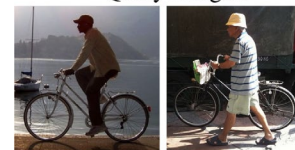

Labels:

positive

negative

---

# The Bongard-Tool Benchmark



# Benchmark Formulation

Positive Examples

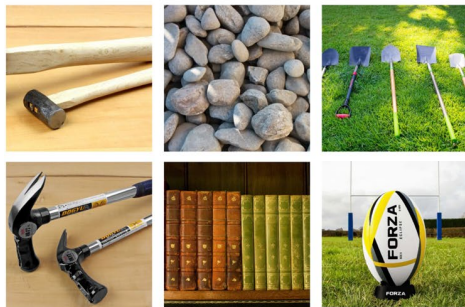

**1 Query Image**  
to be predicted

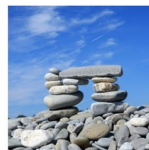

Negative Examples

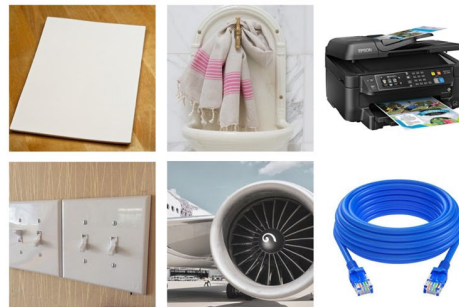

**M=6 Tools**  
that **cannot** support the function

**M=6 Tools**  
that **can** support the same function

# Dataset Collection

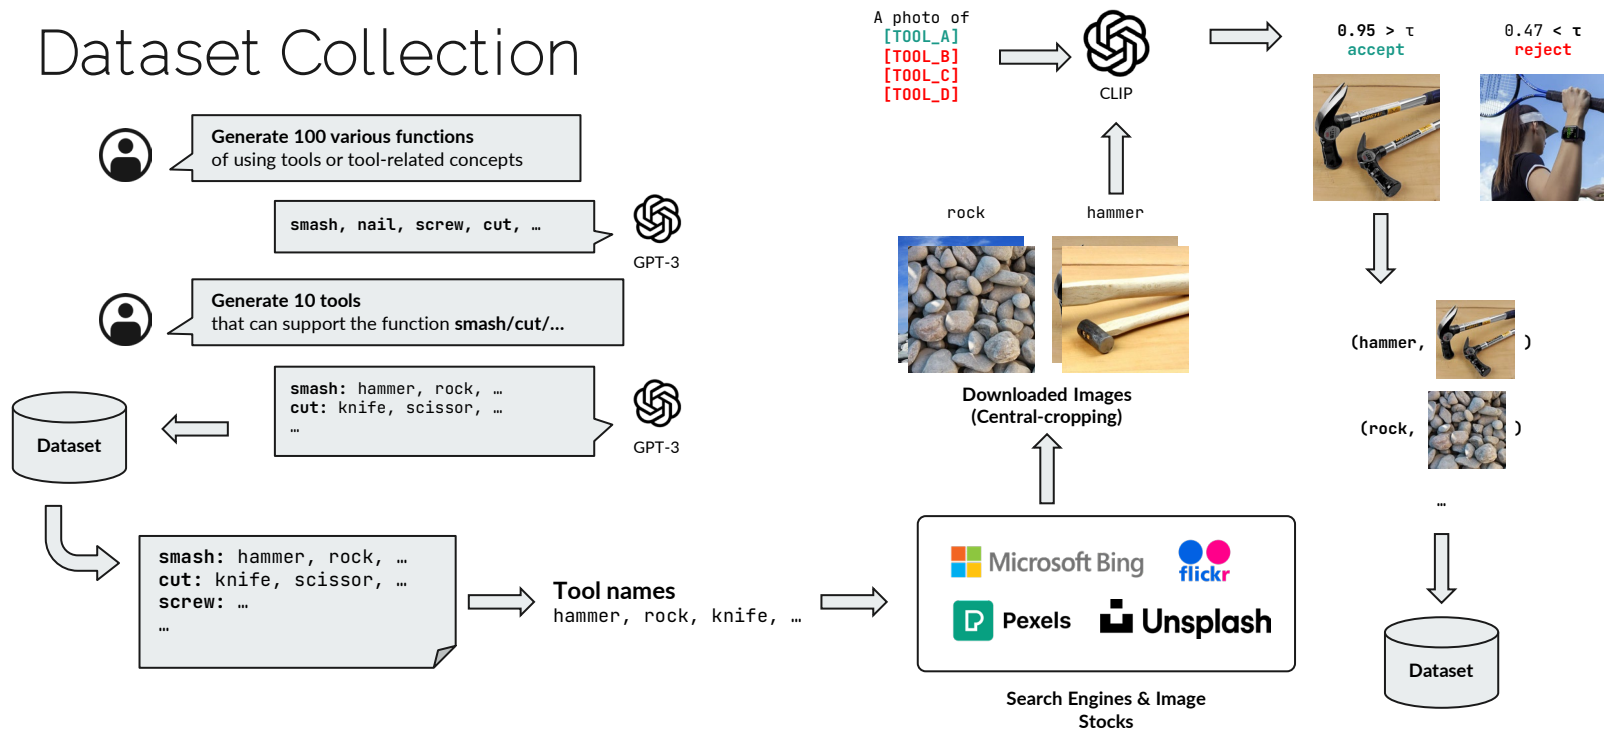

# Bongard Instance Generation

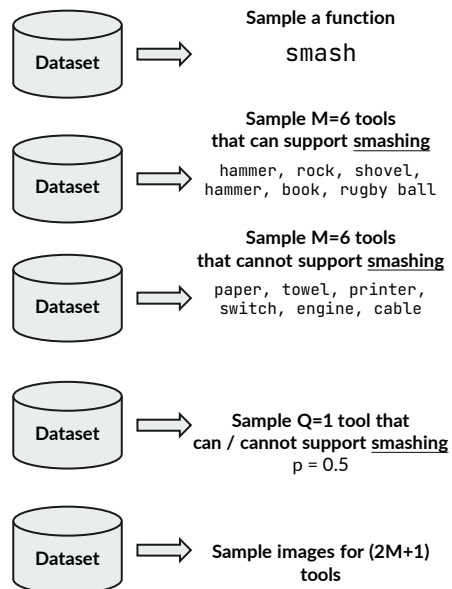

Positive Examples

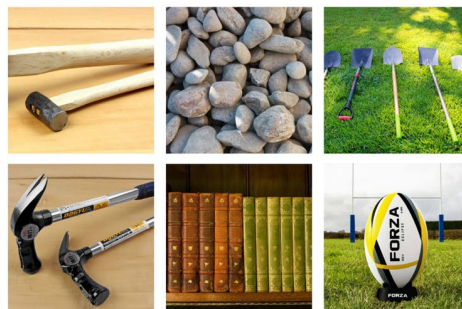

Negative Examples

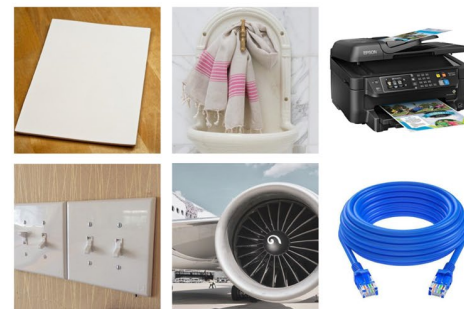

Query Images

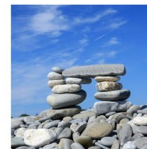



# Text-Image Mismatch in Dataset Construction

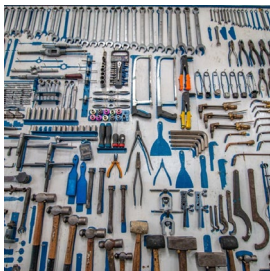

## Tool Cluster (Many-to-One)

Hammer? Piler? Saw? ...

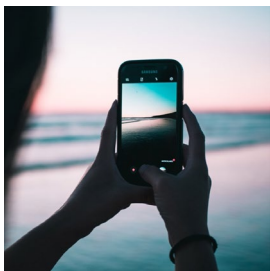

## Grounding Disagreement

Camera? Camera App? Camera Logo? ...

## Text Polysemy (One-to-Many)

Rock? Johnson the Rock? Rock'n'Roll? ...

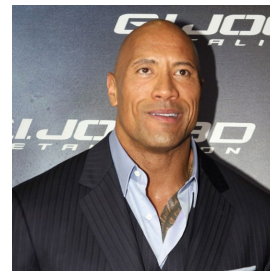

## Rare / Abstract Tools

Brick Hammer? PDF File? ...

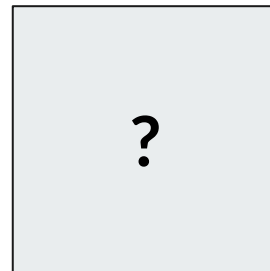



---

# Baseline Experiments with Existing Methods



## Normal Split v.s. Conceptual Generalization Split

### Normal Split:

- sample Bongard-Tool instances from the whole dataset
- randomly select: 80% for training and 20% for testing
- **models have seen all concepts (functions) in training.**

### Conceptual Generalization Split:

- randomly select: 80% of the functions for training 20% for testing
- sample Bongard-Tool instances from training concepts (functions) and testing concepts respectively.
- **models have never seen the testing concepts**

## Test Accuracy / %

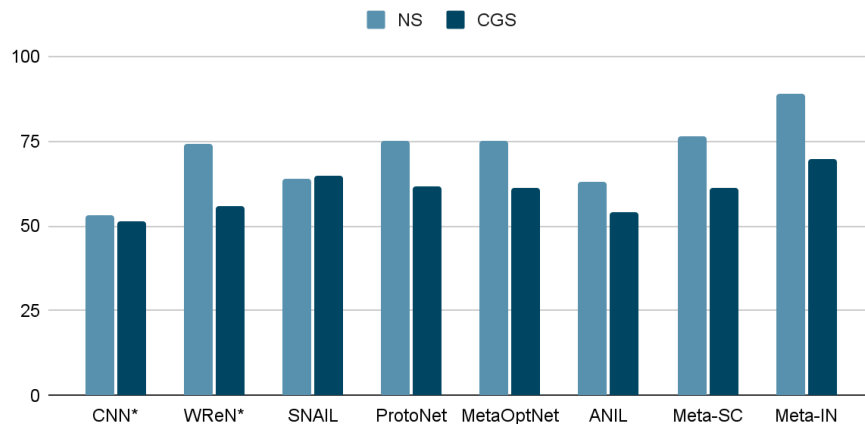

\* Non-Episodic Methods

| Split | Non-Episodic |       |              |              | Meta-Learning Methods |       |         |              |
|-------|--------------|-------|--------------|--------------|-----------------------|-------|---------|--------------|
|       | CNN          | WReN  | SNAIL        | ProtoNet     | MetaOptNet            | ANIL  | Meta-SC | Meta-IN      |
| NS    | 52.97        | 74.10 | 63.91        | <b>75.18</b> | 75.13                 | 63.03 | 76.54   | <b>88.82</b> |
| CGS   | 51.35        | 55.90 | <b>64.42</b> | 61.83        | 61.02                 | 54.29 | 61.37   | <b>69.78</b> |

Table 1: **Test accuracy on baseline methods.** We report the test accuracy of baseline methods on our benchmark. Bold fonts indicate the best result in the group.

- Meta-learning methods generally outperform non-episodic methods
- These models may find some shortcuts to our Bongard-Tool tasks.
- Visual representations are not enough.

---

# Discussion

# Tool Understanding



|                       | Group 1: canonical tools | Group 2: household objects | Group 3: stones |
|-----------------------|--------------------------|----------------------------|-----------------|
| tool candidates       |                          |                            |                 |
| Task 1<br>chop wood   |                          |                            |                 |
| Task 2<br>shovel dirt |                          |                            |                 |
| Task 3<br>paint wall  |                          |                            |                 |

# Concept Induction

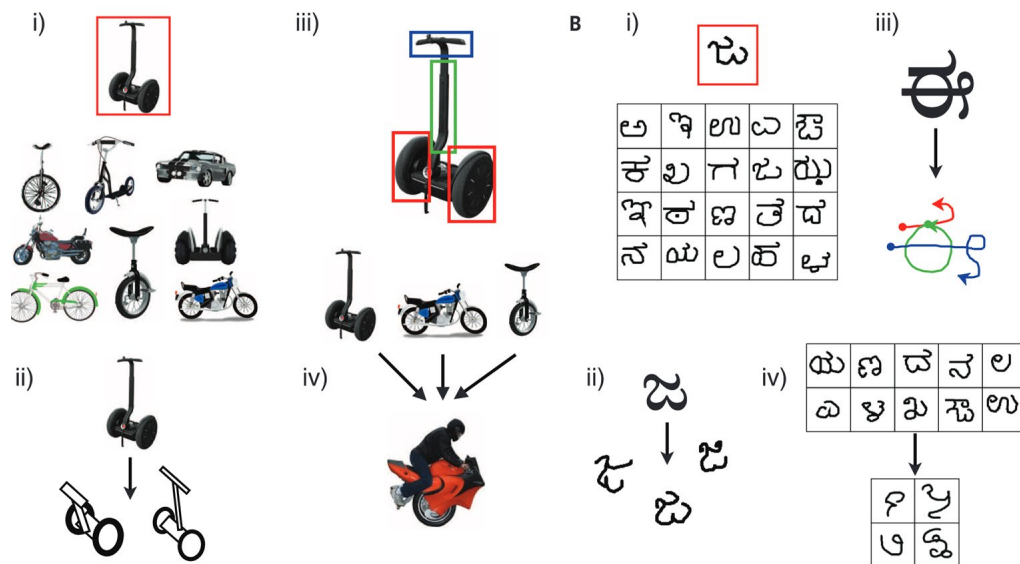

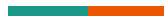

## Few-Shot Visual Classification v.s. Few-Shot Reasoning

- Requires almost no high-level reasoning ability
- Object-level knowledge
- A test-bed for visual perception ability
- Requires high-level **reasoning** ability
- **Object & function**-level knowledge
- A test-bed for visual reasoning ability

---

# Conclusion





## Problem Formulation: What is Bongard-Tool?

- We take the **form** of **Bongard**, but base on the **affordance** and **functionalities** of **tools**.
- Our benchmark requires more knowledge than the information provided by the images.
- For explainable human-level **induction**, many aspects should be taken into consideration, including **priors** of **physical properties of tools**, **experiences** of using tools, etc.
- Existing methods show **acceptable performance**, but it is more likely that they find **shortcuts** between tool functionalities and their image patterns.



## Contributions

- We formulate the context-dependent tool understanding as a few-shot concept induction problem, which can represent a broad range of compositional functionalities of tools.
- We propose the Bongard-Tool benchmark for addressing the context-dependent tool understanding in visual reasoning. Extensive experiments on recent few-shot and meta-learning methods show the hardship of understanding compositional tool concepts from pure visual perception.
- We demonstrate the effectiveness of fast constructing large-scale datasets by utilizing large language models for knowledge building, web crawling, and vision-language models for content retrieval and filtering.



# Bongard-Tool: Tool Concept Induction from Few-Shot Visual Exemplars

## Team UnCoReable

Guangyuan Jiang\* Chuyue Tang\* Yuyang Li† Yu Liu†

\* Yuanpei Collage, Peking University

† Department of Automation, Tsinghua University

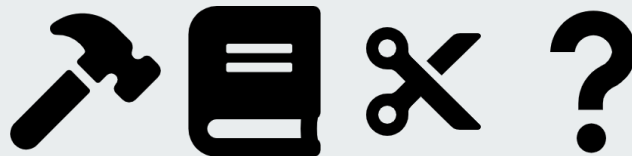

Supplement: supplementary_material [file attachment]
